# Supplementary material
Source: bioRxiv or medRxiv preprint supplement (https://www.biorxiv.org/highwire/filestream/13805/field_highwire_adjunct_files/5/050641-6.pdf)

# Supplemental Figure 6 – Track Axis-Tuned Neurons in the Open Arena

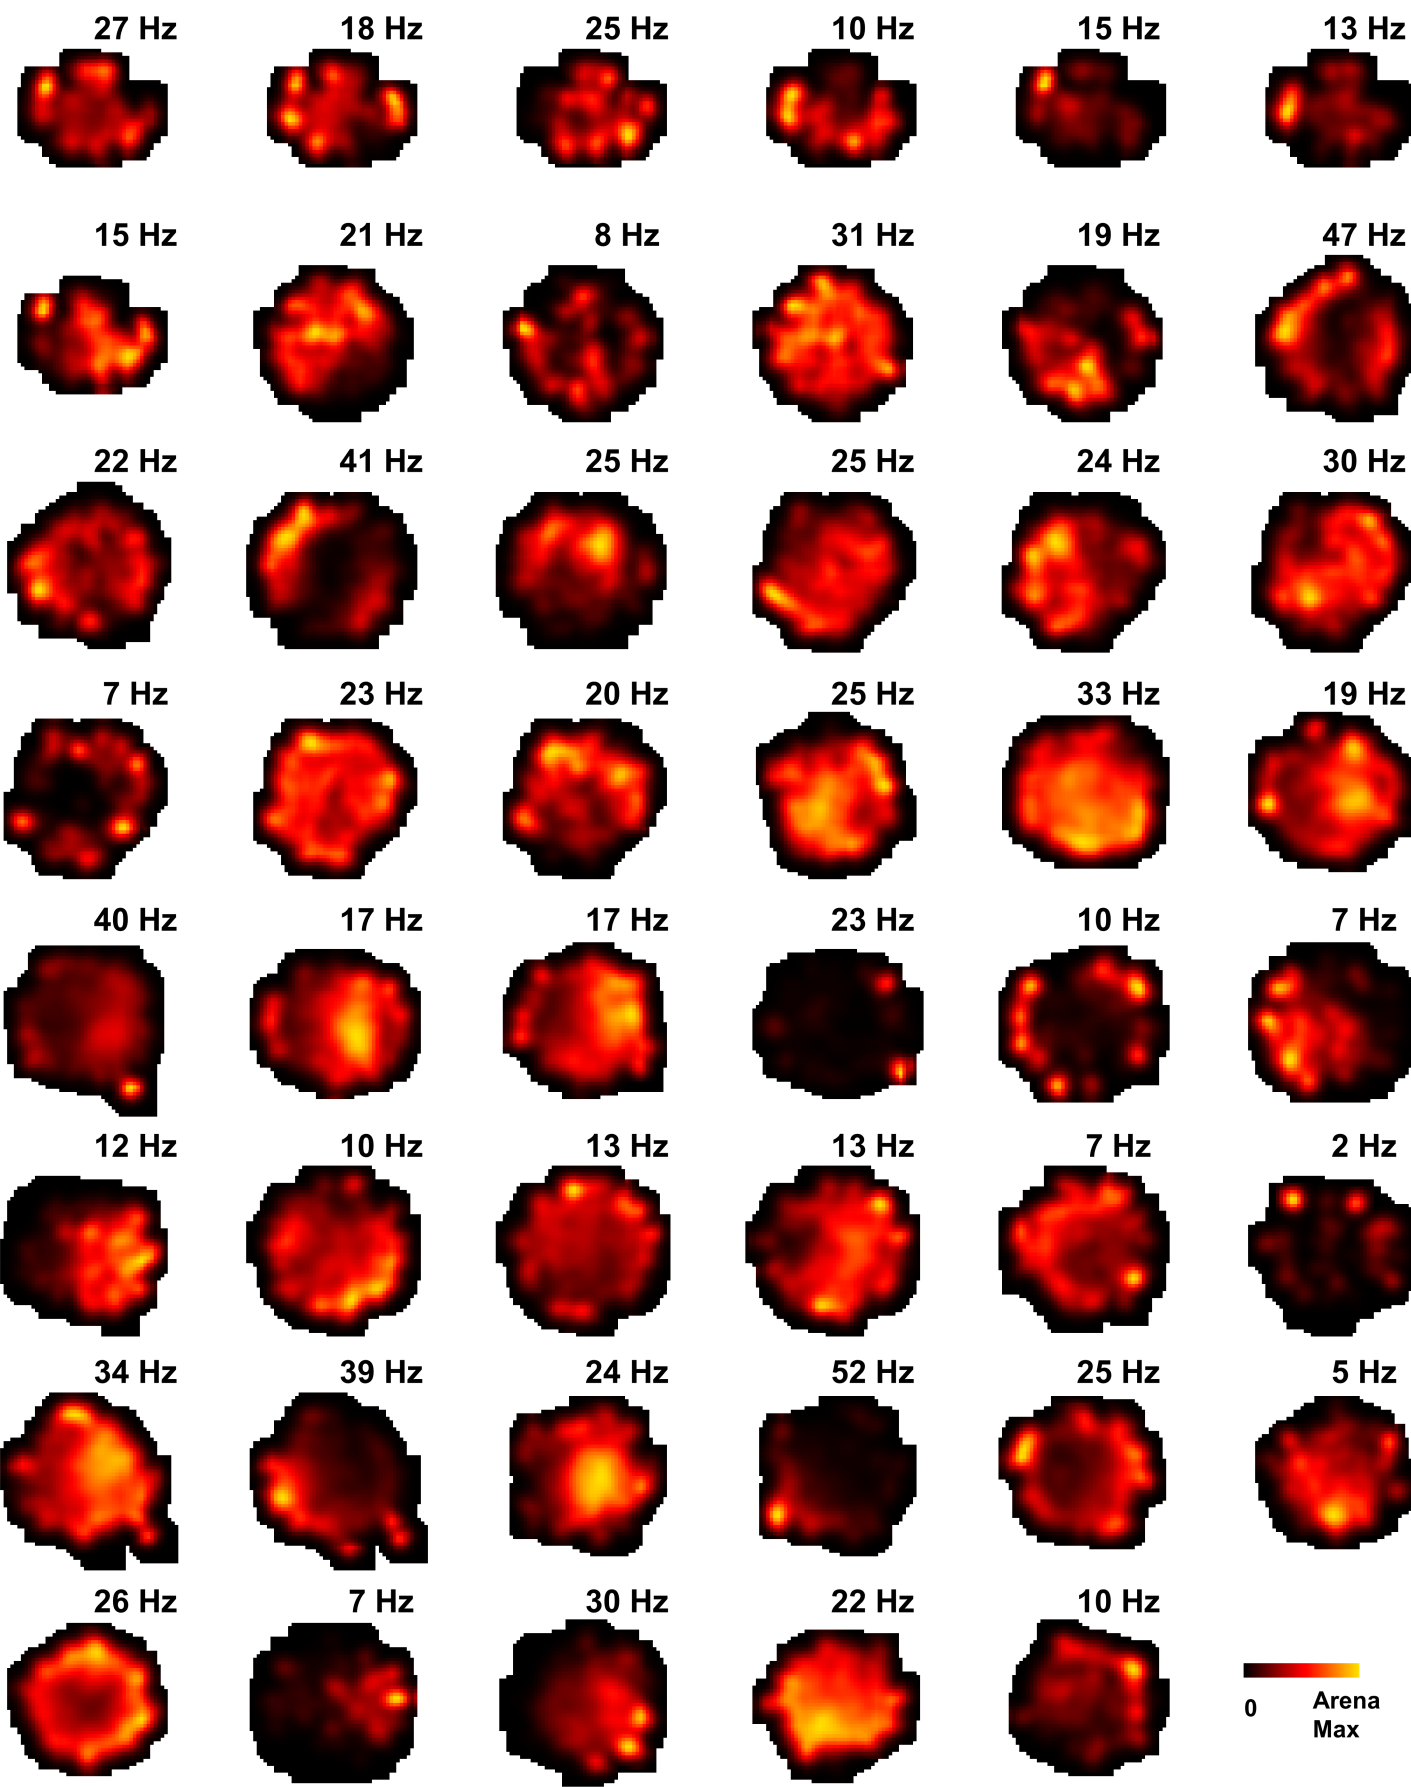

Supplement: Supplementary file [file 050641-6.pdf]
